# Supplementary material for: Molecular Profiles of Cell-to-Cell Variation in the Regenerative Potential of Mesenchymal Stromal Cells
Source: Hindawi journal article supplement (doi:10.1155/2019/5924878), 2019-09-17
Supplement: f1 [file 5924878.f1.pdf]

SUPPLEMENTARY TABLE: Nomenclature for global molecular signatures.

| Symbol  | Protein name                              | Symbol  | Protein name                                              |
|---------|-------------------------------------------|---------|-----------------------------------------------------------|
| ABCA1   | ATP binding cassette subfamily A member 1 | COX2    | Cytochrome c oxidase subunit II, cyclooxygenase 2         |
| ABCG1   | ATP binding cassette subfamily G member 1 | CTGF    | Connective tissue growth factor                           |
| ACAN    | Aggrecan                                  | CXCL1   | C-X-C motif chemokine ligand 1                            |
| ACVR1   | Activin A receptor type 1                 | CXCL12  | C-X-C motif chemokine ligand 12                           |
| ADAR    | Adenosine deaminase RNA specific          | DCN     | Decorin                                                   |
| ALDH1A1 | Aldehyde dehydrogenase 1 family member A1 | DLG7    | Discs large homolog 7                                     |
| ALP1    | Alkaline phosphatase 1                    | DLK1    | Delta like non-canonical Notch ligand 1                   |
| ANG     | Angiogenin                                | DLL3    | Delta-like 3                                              |
| ANGPTL3 | Angiopoietin like 3                       | DLX3    | Distal-less homeobox 3                                    |
| ANXA1   | Annexin A1                                | DLX5    | Distal-less homeobox 5                                    |
| APOH    | Apolipoprotein H                          | DTX1    | Deltex homolog 1                                          |
| ASPM    | Asp (abnormal spindle) homolog            | DVL1    | Dishevelled, dsh homolog 1                                |
| ASPN    | Asporin                                   | E2F2    | E2F transcription factor 2                                |
| AURKB   | Aurora kinase B                           | EIF2AK2 | Eukaryotic translation initiation factor 2 alpha kinase 2 |
| BMP2    | Bone morphogenetic protein 2              | ENO1    | Enolase 1                                                 |
| BMP4    | Bone morphogenetic protein 4              | EYA1    | Eyes absent homolog 1                                     |
| BST2    | Bone marrow stromal cell antigen 2        | FGF1    | Fibroblast growth factor 1 (acidic)                       |
| CALD1   | Caldesmon 1                               | FGF2    | Fibroblast growth factor 2 (basic)                        |
| CALM1   | Calmodulin 1                              | FGFR3   | Fibroblast growth factor receptor 3                       |
| CCNB2   | Cyclin B2                                 | FMOD    | Fibromodulin                                              |
| CCND2   | Cyclin D2                                 | FOXA2   | Forkhead box A2                                           |
| CD44    | CD44 molecule                             | FOXC2   | Forkhead box C2                                           |
| CDC2    | Cell division cycle 2                     | GAPDH   | Glyceraldehyde 3-phosphate dehydrogenase                  |
| CDC20   | Cell division cycle 20 homolog            | GDF2    | Growth differentiation factor 2                           |
| CDH1    | Cadherin 1, type 1, E-cadherin            | GINS2   | GINS complex subunit 2                                    |
| CEBPA   | CCAAT/enhancer binding protein alpha      | GLI1    | GLI family zinc finger 1                                  |
| CENPF   | Centomere protein F                       | GNAS    | GNAS complex locus                                        |
| CEP55   | Centrosomal protein 55 kDa                | GREM1   | Gremlin 1, DAN family BMP antagonist                      |
| CHEK1   | Checkpoint kinase 1                       | HEY1    | Hairy/enhancer-of-split related with YRPW motif 1         |
| CIT     | Citron Rho-interacting kinase             | HSP27   | Heat shock protein 27                                     |
| CKS2    | CDC28 protein kinase regulatory subunit 2 | HSPA9   | Heat shock 70 kDa protein 9, mortalin                     |
| CNN1    | Calponin 1                                | IBSP    | Integrin binding sialoprotein                             |
| COL1A1  | Collagen type I alpha 1                   | ICAM1   | Intercellular adhesion molecule 1                         |
| COL2A1  | Collagen type II alpha 1                  | IDO1    | Indoleamine 2,3-dioxygenase 1                             |
| COMP    | Cartilage oligomeric matrix protein       | IGF1    | Insulin-like growth factor 1                              |

(continued)

SUPPLEMENTARY TABLE (CONTINUED)

| Symbol  | Protein name                                   | Symbol | Protein name                                     |
|---------|------------------------------------------------|--------|--------------------------------------------------|
| IL1A    | Interleukin 1 alpha                            | PITX1  | Paired like homeodomain 1                        |
| IL1B    | Interleukin 1 beta                             | PKM    | Pyruvate kinase isozymes M1/M2                   |
| IL6     | Interleukin 6                                  | PLG    | Plasminogen                                      |
| IL8     | Interleukin 8                                  | PLIN4  | Perilipin 4                                      |
| IL18    | Interleukin 18                                 | PLXND1 | Plexin D1                                        |
| INHBB   | Inhibin subunit beta B                         | POLQ   | DNA polymerase theta                             |
| ISG15   | Interferon-stimulated gene 15 kDa protein      | POMC   | Pro-opiomelanocortin                             |
| ISG20   | Interferon-stimulated gene 20 kDa protein      | PPARG  | Peroxisome proliferator-activated receptor gamma |
| JAG1    | Jagged 1                                       | PRDM16 | PR/SET domain 16                                 |
| LDB2    | LIM domain-binding 2                           | PRRX1  | Paired related homeobox 1                        |
| LMNA    | Lamin A/C                                      | PRRX2  | Paired related homeobox 2                        |
| LPL     | Lipoprotein lipase                             | PTCH1  | Patched 1                                        |
| MAD2L1  | MAD2 mitotic arrest deficient 2 like 1         | PTH1R  | Parathyroid hormone 1 receptor                   |
| MEOX2   | Mesenchyme homeobox 2                          | PTPRM  | Protein tyrosine phosphatase receptor type M     |
| METRN   | Meteorin, glial cell differentiation regulator | PTPRU  | Protein tyrosine phosphatase receptor type U     |
| MMP19   | Matrix metalloproteinase 19                    | PTTG1  | Securin, pituitary tumor-transforming 1          |
| MN1     | Meningioma 1                                   | ROR2   | Receptor tyrosine kinase like orphan receptor 2  |
| MSX1    | Msh homeobox 1                                 | RPA3   | Replication protein A3                           |
| MSX2    | Msh homeobox 2                                 | RRM2   | Ribonucleotide reductase M2                      |
| MX1     | MX dynamin like GTPase 1                       | SFRP2  | Secreted frizzled-related protein 2              |
| MX2     | MX dynamin like GTPase 2                       | SOX2   | Sex-determining region Y-box 2                   |
| NCAPG   | Non-SMC condensin I complex subunit G          | SOX5   | Sex-determining region Y-box 5                   |
| NEUROG2 | Neurogenin 2                                   | SP7    | Sp7 transcription factor                         |
| NOTCH1  | Notch homolog 1                                | SPON1  | Spondin 1                                        |
| NR1H3   | Nuclear receptor subfamily 1 group H member 3  | TBX3   | T-box transcription factor 3                     |
| OAS1    | 2'-5'-Oligoadenylate synthetase 1              | TIE1   | Tyrosine kinase 1                                |
| OAS2    | 2'-5'-Oligoadenylate synthetase 2              | TOP2A  | Topoisomerase (DNA) II alpha                     |
| OAS3    | 2'-5'-Oligoadenylate synthetase 3              | TPM4   | Tropomyosin alpha-4 chain                        |
| OASL    | 2'-5'-Oligoadenylate synthetase like           | TUBB3  | Tubulin, beta 3                                  |
| OGN     | Osteoglycin                                    | TWIST1 | Twist homolog 1                                  |
| OMD     | Osteomodulin                                   | UBE2C  | Ubiquitin-conjugated enzyme E2C                  |
| PBK     | PDZ-binding kinase                             | UCP2   | Uncoupling protein 2                             |
| PDGFA   | Platelet derived growth factor subunit alpha   | VCAM1  | Vascular cell adhesion molecule 1                |
| PF4     | Platelet factor 4                              | VEGFB  | Vascular endothelial growth factor beta          |
| PGE2    | Prostaglandin E2                               | WISP1  | WNT1 inducible signaling pathway protein 1       |
| PGF     | Placental growth factor                        | WNT5A  | Wnt family member 5A                             |
